# Supplementary material
Source: PubMed Central journal article supplement (PMC3077989)

# Hopf et al. Suppl. Figure 1

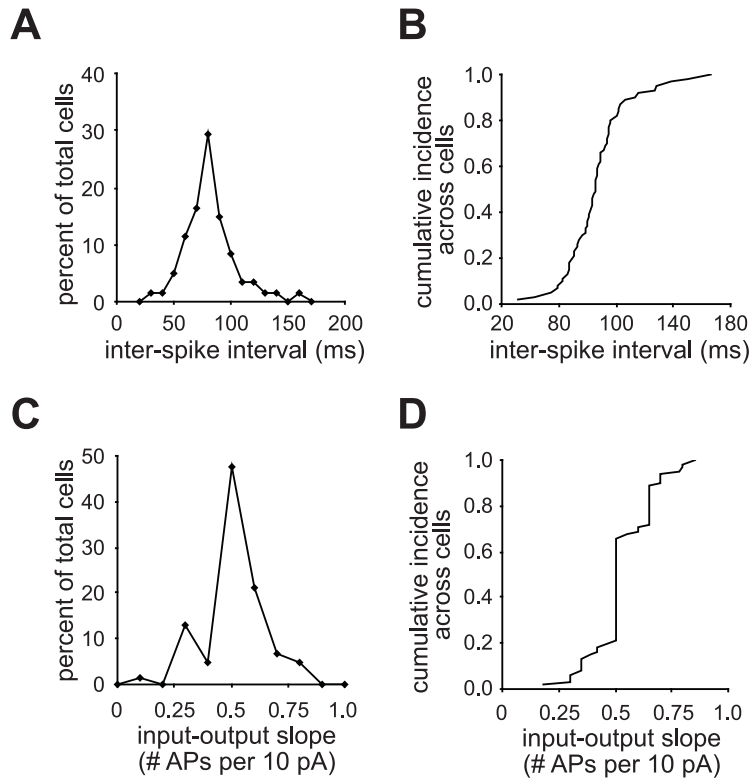

Supplement: NIHMS273860-supplement-Fig_1.pdf [file NIHMS273860-supplement-Fig_1.pdf]
